# Supplementary material for: Thermal degradation related to the PEDOT:PSS hole transport layer and back electrode of the flexible inverted organic photovoltaic module
Source: Royal Society of Chemistry journal article supplement (doi:10.1039/c9se00811j), 2020-01-01
Supplement: c9se00811j1.pdf [file c9se00811j1.pdf]

Supporting Information

**Thermal Degradation Related to Hole Transport Layer and Back  
Electrode of Flexible Inverted Organic Photovoltaic Module**

Hyoung Jin Son, Hong-Kwan Park, Ji Yeon Moona, Byeong-Kwon Ju  
and Sung Hyun Kim\*

(a)

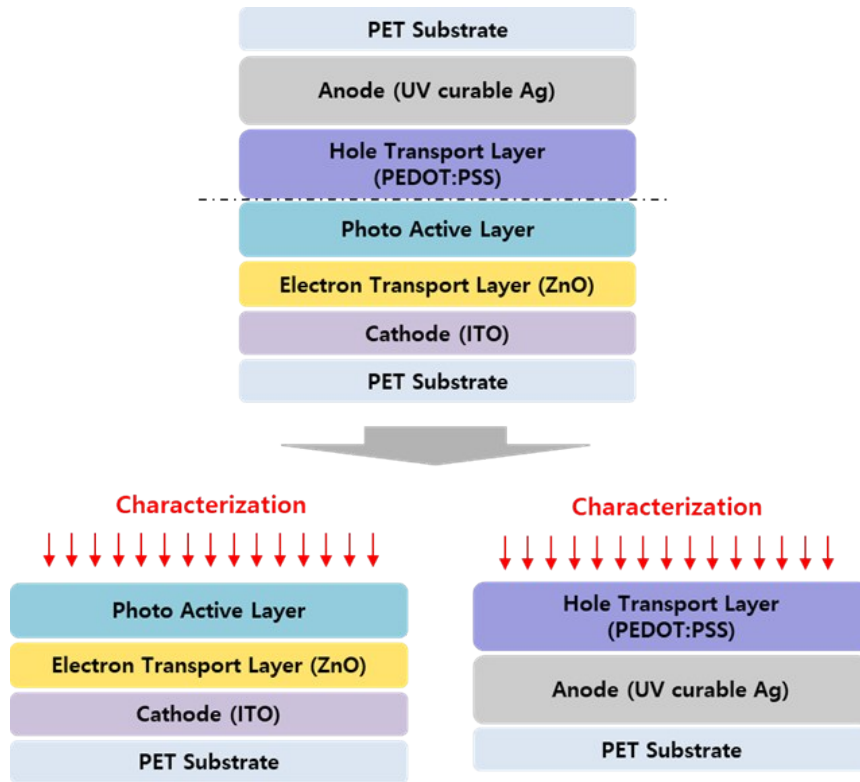

(b)

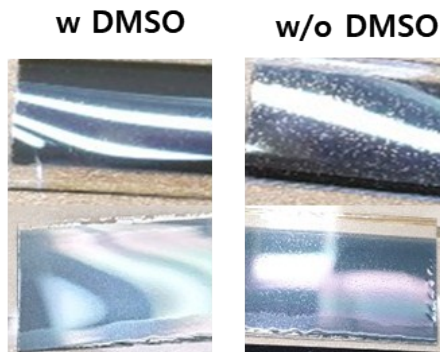

**Figure S1.** (a) Illustration and (b) photograph showing the method of accessing interlayers of the OPV module by delaminating between the active (upper) and PEDOT:PSS layers with and without DMSO (bottom).

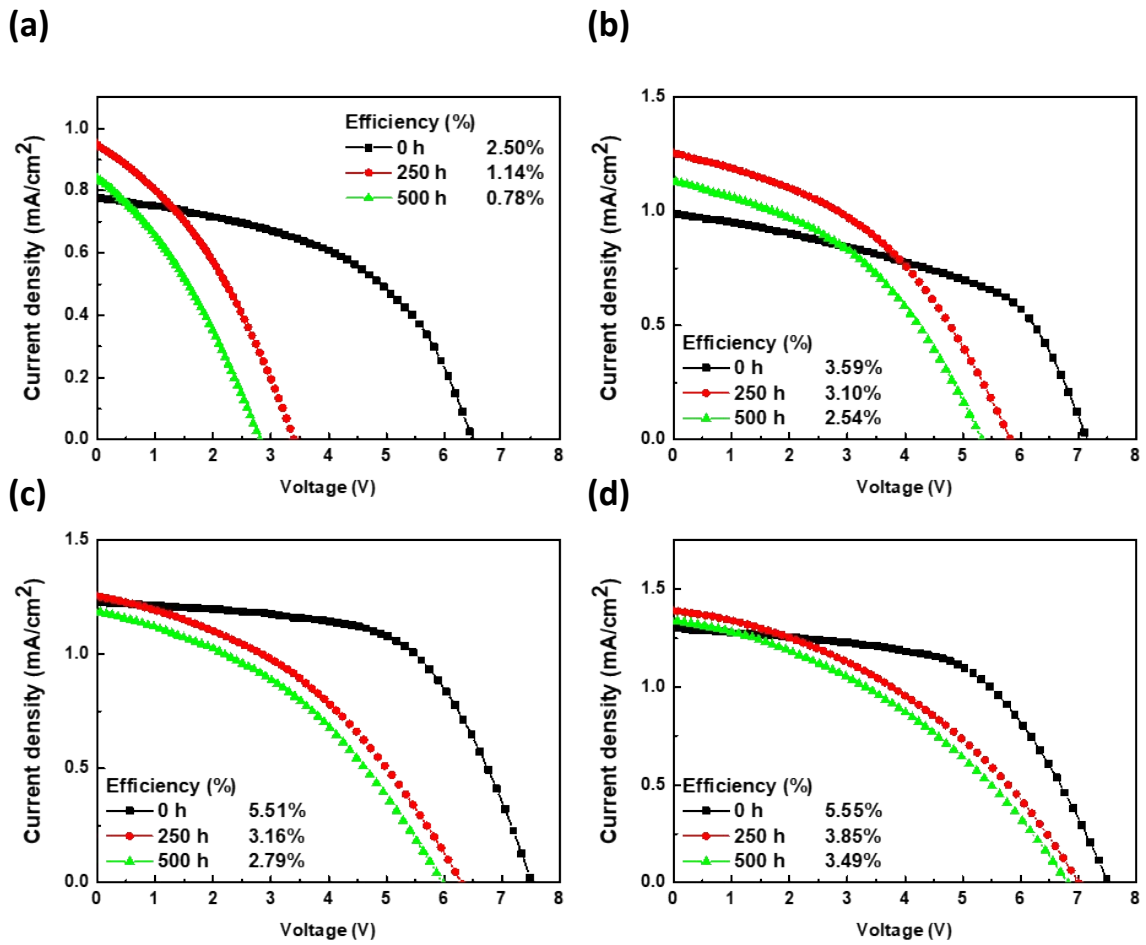

**Figure S2.** Degradation in  $J-V$  characteristics of the OPV devices with different thickness of the PEDOT:PSS HTL as they were thermally aged at 85 °C in the same chamber. Each graph corresponds to the device with (a) 250 nm, (b) 500 nm, (c) 700, and (d) 1400 nm thick PEDOT:PSS HTLs.
